Anesthesiology  
1996; 85:468-74  
© 1996 American Society of Anesthesiologists, Inc.  
Lippincott-Raven Publishers

## Comparison between Radionuclide Ejection Fraction and Fractional Area Changes Derived from Transesophageal Echocardiography Using Automated Border Detection

Ngai Liu, M.D.,\* Pierre-Louis Darmon, M.D.,\* Michel Saada, M.D.,† Patrick Catoire, M.D.† Jean Rosso, M.D.,‡ Geneviève Berger, M.D.,§ Francis Bonnet, M.D.\*

**Background:** Left ventricular fractional area changes (FAC) can be derived from transesophageal echocardiography using an automated border detection system. However, FAC has not yet been compared to left ventricular ejection fraction (EF) evaluated by a reference technique. The aim of this study was to correlate transesophageal echocardiography automated FAC to EF derived from radionuclide angiography to obtain a quantifying method of global left ventricular systolic function at the bedside.

**Methods:** Ten critically ill patients, whose lungs were mechanically ventilated, were included in this prospective study. Patients were scheduled for radionuclide EF evaluation when at least 75% of the endocardium was clearly visualized on transesophageal echocardiography. Patients with esophageal pathology or cardiac dysrhythmia were excluded. Ejection fraction derived from radionuclide angiography was measured using technetium 99m. Echocardiographic data were obtained using an ultrasound system with automated border capabilities. Simultaneous measurements of left ventricular EF and FAC were obtained for each patient, both before and after starting a dobutamine intravenous infusion to modify left ventricular contractility.

**Results:** Mean values for radionuclide EF and transesophageal echocardiography FAC were, respectively:  $55\% \pm 19\%$  (range 19–89%) and  $46\% \pm 18\%$  (range 17–80%). Left ventricular EF and FAC were significantly correlated ( $r = 0.85$ , SEE = 9.6%). Variations of EF and FAC, induced by dobutamine, were also correlated ( $r = 0.70$ , SEE = 4.9%).

**Conclusions:** Fractional area changes determined by trans-

esophageal echocardiography using automated border detection correlate well with radionuclide EF and may be used at the bedside to quantify left ventricular function in selected intensive care unit patients. (Key words: Heart: left ventricular function. Monitoring: radionuclide angiography. Monitoring, transesophageal echocardiography: edge detection; ejection fraction; fractional area changes.)

TRANSESOPHAGEAL echocardiography (TEE) provides reliable information about regional and global left ventricular function.<sup>1-3</sup> It allows estimation of left ventricular volume from left ventricular area.<sup>4-7</sup> In addition, transesophageal echocardiographic fractional area changes (FAC), defined as end-diastolic area (EDA) minus end-systolic area (ESA) divided by end-diastolic area ( $FAC = [EDA - ESA]/EDA$ ), and measured at the level of the mid-papillary muscles, are highly correlated to ejection fraction (EF), defined as end-diastolic volume (EDV) minus end-systolic volume (ESV) divided by end-diastolic volume ( $EF = [EDV - ESV]/EDV$ ), and derived from radionuclide angiography.<sup>4,7</sup> Nevertheless, in clinical practice, quantitative TEE evaluation of FAC, as an index of global left ventricular systolic function, is time consuming, and requires manual tracing of at least two freeze-frame images. Thus, considerable attention has been dedicated to the development of automated systems capable of quantifying left ventricular function in real-time. A recent technique has been developed to automatically delineate the endocardial border of the left ventricle, allowing a continuous on-line assessment of FAC. Several studies have validated this automated system compared to manual tracing using either transthoracic<sup>8-10</sup> or transesophageal<sup>11</sup> echocardiography. Recent studies<sup>12-14</sup> compared the automated border detection technique to a reference technique, but none of them used TEE. Because TEE generally produces better images than transthoracic echocardiography does, it might generate better automated border detection esti-

\* Unité de Réanimation Chirurgicale, Hôpital Henri Mondor, Créteil.

† Département d'Anesthésie, Hôpital de la Pitié-Salpêtrière, Paris.

‡ Service de Médecine Nucléaire, Hôpital Henri Mondor, Créteil.

§ Laboratoire CNRS-URA 1458, Paris.

Received from the Unité de Réanimation Chirurgicale and the Service de Médecine Nucléaire, Hôpital Henri Mondor, Créteil; Département d'Anesthésie, Hôpital de la Pitié-Salpêtrière, Paris; and §Laboratoire CNRS-URA 1458, Paris. Submitted for publication May 23, 1995. Accepted for publication April 30, 1996.

Address reprint requests to Dr. Bonnet: Unité de Réanimation Chirurgicale 51, Avenue du Mal de Lattre de Tassigny, 94010 Créteil, FRANCE.

mates. The aim of real-time evaluation of FAC, derived from a system (automated FAC) by radionuclide an-

### Methods and M

**Patients Selection**  
After approval of the local ethics committee, 10 critically ill patients, mechanically ventilated, were enrolled in the study when at least 75% of the endocardium was visualized by human echocardiography.

**Radionuclide Angiography**  
Radionuclide EF was measured using a method proposed by the authors before the first acquisition of the pyrophosphate was 99m (740 MBq) was injected into a gated pool imaging system (Mobile, Siemens, France). The collimator was placed 10 cm from the patient's chest to obtain a clear image of the heart. Five hundred thousand counts were acquired on a 64 × 64 matrix. The angle of the camera was 30°. The procedure was performed with application of the software stored on a hard disk.

**Transesophageal Echocardiography**  
After induction of anesthesia, transesophageal echocardiography was performed using an ultrasonograph (Sonos 2500, Philips, MA), was positioned in the short-axis view of the left ventricle. The mid-papillary muscle was visualized. The echocardiographic images were recorded on an AG6200 videocassette recorder.

## RADIONUCLIDE EF COMPARED TO TEE FAC

mates. The aim of the current study was to compare real-time evaluation of transesophageal left ventricular FAC, derived from an automated border detection system (automated FAC), to left ventricular EF assessed by radionuclide angiography.

### Methods and Materials

#### Patients Selection

After approval of our Institutional Review Board (Hôpital Henri Mondor, Université Paris XII), and obtaining written informed consent from patients' families, ten critically ill patients, whose lungs were mechanically ventilated, were enrolled in this prospective study. Patients were scheduled for radionuclide EF evaluation when at least 75% of the endocardium was clearly visualized by human eye on TEE. We excluded patients with chronic or acute esophagus pathology, and patients with cardiac dysrhythmia.

#### Radionuclide Angiography

Radionuclide EF was measured according to the method proposed by Stanck *et al.*<sup>15</sup> Thirty minutes before the first acquisition data period, 5 mg stannous pyrophosphate was injected intravenously. Technetium 99m (740 MBq) was injected immediately before the gated pool imaging. A scintillation camera (Low Energy Mobile, Siemens, Paris, France) equipped with a parallel slant-hole collimator was then positioned over the patient's chest to obtain a left anterior oblique view that most clearly defined the interventricular septum. Five hundred thousand count images were recorded on a  $64 \times 64$  matrix during a 6-12-min period. The angle of the camera was held fixed throughout the procedure. The photopeak was centered at 140 keV, with application of a 20% energy window. Data were stored on a hard disk for computation.

#### Transesophageal Echocardiography

After induction of general anesthesia, a 5-MHz transesophageal transverse monoplane probe, connected to an ultrasonograph (Hewlett-Packard Sonos 1000, Andover, MA), was positioned to visualize the transgastric short-axis view of the left ventricle, at the level of the mid-papillary muscles.<sup>16</sup> After a complete TEE examination was performed, short-axis images of the left ventricle were recorded on VHS videotapes (Panasonic AG6200 videocassette recorder, Matsushita, Japan).

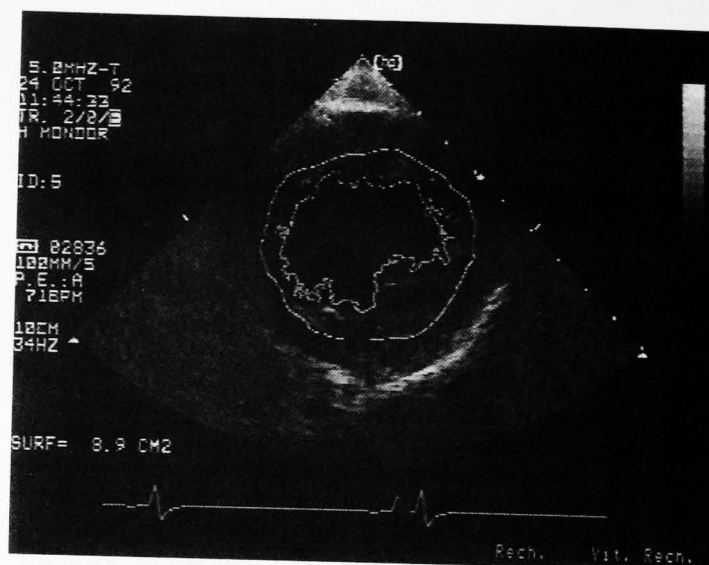

Fig. 1. Short-axis echocardiographic image of the left ventricle at the mid-papillary muscles level, with automated border detection activated. The region of interest has been defined (the white line through the left ventricular myocardium around the left ventricular cavity). The automatically detected endocardial border is shown as the inner dotted line.

The probe was held fixed, scanning the left ventricle at the same level throughout the procedure.

**Automated Border Detection System** The ultrasonograph made use of the integrated backscatter imaging software.<sup>8-11,17-19</sup> The automated border detection system analyzed each radiofrequency A-line over a  $3.2\text{-}\mu\text{s}$  period. The backscatter data along each scan line were used to discriminate the blood-tissue interface of the endocardium. This interface is represented on the two-dimensional image, as a dotted line (fig. 1). The operator adjusted the gain controls to track at least 75% of the circumference of the left ventricle endocardium with the highlighted border indicator. Then, using the trackball of the ultrasonograph, the operator outlined a region of interest that included only the left ventricular cavity. A calculation and graphic software package computed and displayed continuously the area within the region of interest and the derived FAC (fig. 2).

**Manual Transesophageal Echocardiography Tracing** Left ventricular images were analyzed off-line and by two independent investigators who were unaware of radionuclide EF and automated FAC results. End-diastolic area was measured at the peak of the electrocardiographic R-wave. End-systolic area was defined as the smallest left ventricular cavity determined by visual inspection. Measurements of the left ventricular area were performed over three consecutive cardiac cycles

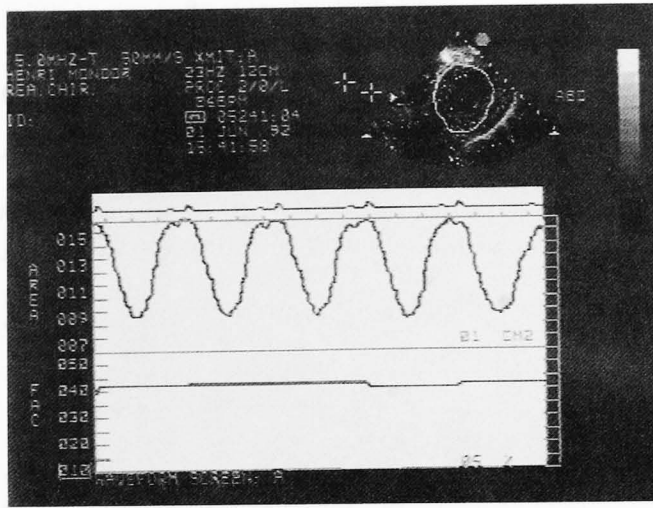

Fig. 2. The small sector in the upper right corner shows the short-axis view after activation of the automated border detection. The upper trace (AREA) shows the cavity area computed and displayed instantaneously with calibration marks (in  $\text{cm}^2$ ). The lower trace displays the on-line computed fractional area changes with calibration marks (in %).

for averaging, using the black-white interface.<sup>20</sup> Each left ventricular cross-sectional area measurement considered for manual FAC determination was the mean of the values derived from both independent observers. Fractional area changes were calculated from the following formula:  $\text{FAC} (\%) = (\text{EDA} - \text{ESA}) \times 100 / (\text{EDA})$ . Because segmental wall motion abnormalities of the left ventricle could alter the correlation between FAC and EF,<sup>21</sup> these were also reported.

#### Study Protocol

Transesophageal echocardiography and radionuclide angiography were performed simultaneously in the radionuclide imaging department. Arterial blood pressure, pulse oximetry and 3-lead electrocardiogram were continuously monitored throughout the study protocol. Two sets of left ventricular EF and FAC measurements were obtained for each patient, before and 15 min after starting a  $5 \mu\text{g} \cdot \text{kg}^{-1} \cdot \text{min}^{-1}$  dobutamine intravenous infusion. The infusion goal was to modify left ventricular contractility, thus testing the ability of the TEE automated system to detect EF variations.

**Sequences of Data Acquisition** Echocardiographic images were recorded during apnea. Controlled ventilation was maintained during radionuclide angiography because of the length duration of the procedure (6-intravenous infusion. The infusion goal was to modify left ventricular contractility, thus testing the ability of the TEE automated system to detect EF variations.

**Sequences of Data Acquisition** Echocardiographic images were recorded during apnea. Controlled venti-

beginning of the procedure, they were not changed during the study protocol period. Fractional area changes determined by automated border detection were sampled at the beginning, middle, and end of the radionuclide angiography acquisition period. The FAC value considered for the comparison with angiographic EF was the average of these three measurements. All echocardiographic and radionuclide angiographic data were collected at two different periods: before and 15 min after starting the dobutamine infusion.

#### Statistical Analysis

Results are expressed as mean  $\pm$  standard deviation. Echocardiographic FAC and radionuclide EF, as well as variations before and after dobutamine administration, were compared using linear regression analysis. Intraobserver variability for radionuclide imaging and interobserver variability for TEE manually traced area determinations were expressed as the difference between two measurements divided by the mean value and multiplied by 100. Automated and manually drawn TEE FAC were compared using linear regression and bias analysis.<sup>22</sup> Statistical significance was determined using the Wilcoxon signed rank test for paired data;  $P < 0.05$  was considered significant.

## Results

#### Patients

No complication occurred during the study protocol. One patient could not be included in the study because of insufficient endocardial definition on TEE. Patients' demographic characteristics are given in table 1. Six of

Table 1. Patient Demographics

| Patient No. | Diagnosis                  | Age (yr) | Sex |
|-------------|----------------------------|----------|-----|
| 1           | Multiple trauma            | 47       | F   |
| 2           | Septic shock               | 51       | F   |
| 3           | Pneumonia                  | 92       | F   |
| 4           | Obstructive cardiomyopathy | 70       | M   |
| 5           | COPD                       | 79       | F   |
| 6           | Multiple trauma            | 25       | M   |
| 7           | Septic shock               | 75       | M   |
| 8           | Mitral valve replacement   | 62       | F   |
| 9           | Cardiogenic shock          | 69       | M   |
| 10          | Aortic valve replacement   | 83       | M   |
| 3           | Pneumonia                  | 92       | F   |
| 4           | Obstructive cardiomyopathy | 70       | M   |
| 5           | COPD                       | 79       | F   |
| 6           | Multiple trauma            | 25       | M   |
| 7           | Septic shock               | 75       | M   |
| 8           | Mitral valve replacement   | 62       | F   |
| 9           | Cardiogenic shock          | 69       | M   |
| 10          | Aortic valve replacement   | 83       | M   |
| 3           | Pneumonia                  | 92       | F   |
| 4           | Obstructive cardiomyopathy | 70       | M   |
| 5           | COPD                       | 79       | F   |
| 6           | Multiple trauma            | 25       | M   |
| 7           | Septic shock               | 75       | M   |
| 8           | Mitral valve replacement   | 62       | F   |

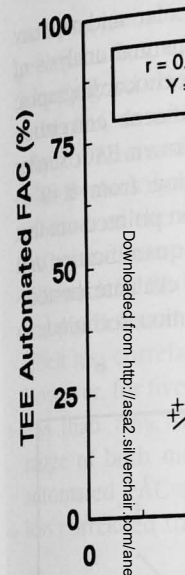

Fig. 3. Comparison of fractional area changes determined by automated border detection and manually drawn TEE FAC. The regression line was not significant ( $P = 0.74$ ).

ten patients had been confirmed by a radionuclide study. In two patients, two-dimensional echocardiography showed abnormalities of the left ventricle, in the posterior wall. No segmental wall motion abnormalities were seen in the four patients with a radionuclide EF  $> 50\%$ .

#### Comparison between Automated and Manual TEE Measurements and Radionuclide EF

Transesophageal echocardiography measurements were obtained in the short-axis view of 1-2 min was noted in the region of interest. The correlation between FAC and radionuclide EF before and after dobutamine infusion were also compared (fig. 4). The mean FAC and radionuclide EF before and after dobutamine infusion were also compared (fig. 4). The mean FAC and radionuclide EF before and after dobutamine infusion were also compared (fig. 4). The mean FAC and radionuclide EF before and after dobutamine infusion were also compared (fig. 4).

## RADIONUCLIDE EF COMPARED TO TEE FAC

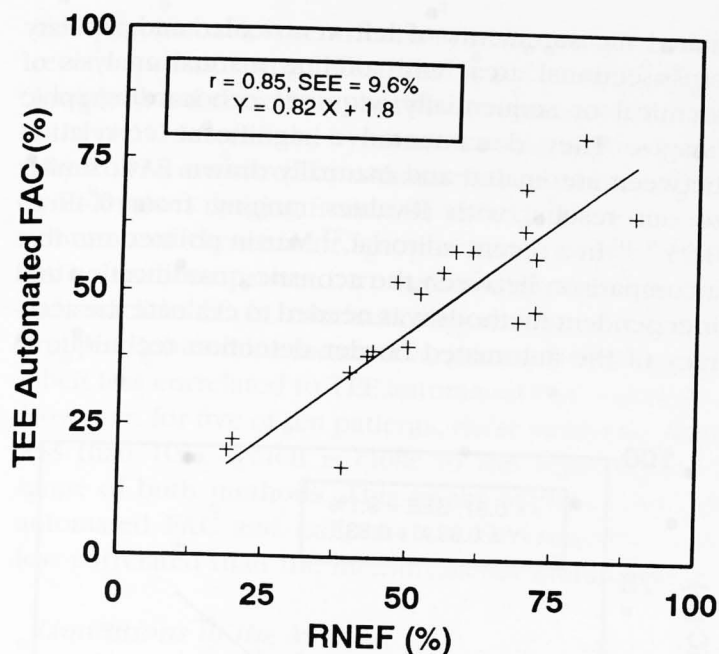

Fig. 3. Comparison between transesophageal automated fractional area changes and radionuclide ejection fraction. Regression line was not statistically different from the identity line ( $P = 0.74$ ).

ten patients had a poor left ventricular function confirmed by a radionuclide EF  $< 50\%$ . Among those six patients, two documented minor segmental wall motion abnormalities visualized on the short-axis view of the left ventricle, in the anterior and lateral walls and in the posterior wall, respectively. These wall motion abnormalities were not modified by dobutamine infusion. No segmental wall motion abnormality was noted in the four patients having a good left ventricular radionuclide EF ( $> 50\%$ ).

#### Comparison between Automated Fractional Area Changes and Radionuclide Ejection Fraction

Transesophageal echocardiographic automated FAC measurements were performed easily. After the left ventricular short-axis view was visualized, an interval of 1-2 min was necessary to adjust gains and draw the region of interest. The intraobserver variability coefficient for radionuclide EF was  $1.0\% \pm 3.6\%$ . A strong correlation was documented between TEE automated FAC and radionuclide EF (fig. 3). Variations of radionuclide EF before and after dobutamine intravenous infusion were also correlated to automated FAC variations (fig. 4). The mean values of radionuclide EF were, respectively,  $51\% \pm 17\%$  (range 19-72%) before, and  $58\% \pm 21\%$  (range 20-89%) after dobutamine infusion.

The increase in radionuclide EF was significant ( $P < 0.01$ , Wilcoxon test), and varied from 0% to 17%. The mean values for TEE automated FAC were, respectively,  $41\% \pm 15\%$  (range 17-62%) before, and  $51\% \pm 20\%$  (range 17-80%) after dobutamine infusion. The rise in automated FAC also was significant ( $P < 0.01$ , Wilcoxon test), and varied from 0% to 18%; however, this increment was less than 10% for five patients.

#### Comparisons between Manually Traced Fractional Area Changes and Radionuclide Ejection Fraction

The mean values of TEE manual FAC were, respectively,  $44\% \pm 14\%$  (range 23-69%) before, and  $54\% \pm 18\%$  (range 26-75%) after dobutamine infusion. The increase in manual FAC also was significant ( $P < 0.01$ , Wilcoxon test), and varied from 1% to 32%. A high correlation also was documented between TEE manual FAC and radionuclide EF (fig. 5).

#### Comparison between Manually Traced and Automated Fractional Area Changes

Interobserver variability for TEE manual FAC was  $6.5\% \pm 15.4\%$ . A significant correlation was documented between FAC obtained from manually drawn

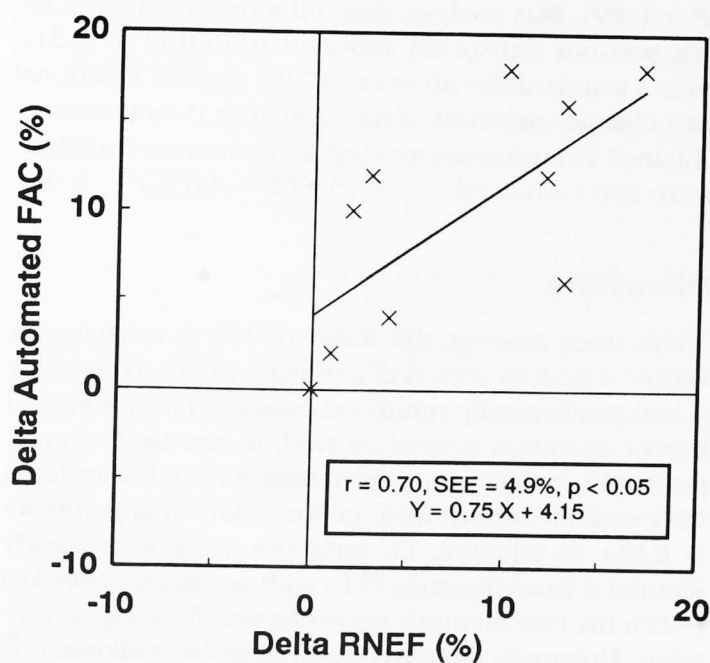

Fig. 4. Linear regression analysis comparing variations of radionuclide ejection fraction and variations of TEE automated fractional area changes before and after dobutamine infusion. Regression line was not statistically different from the identity line ( $P = 0.37$ ).

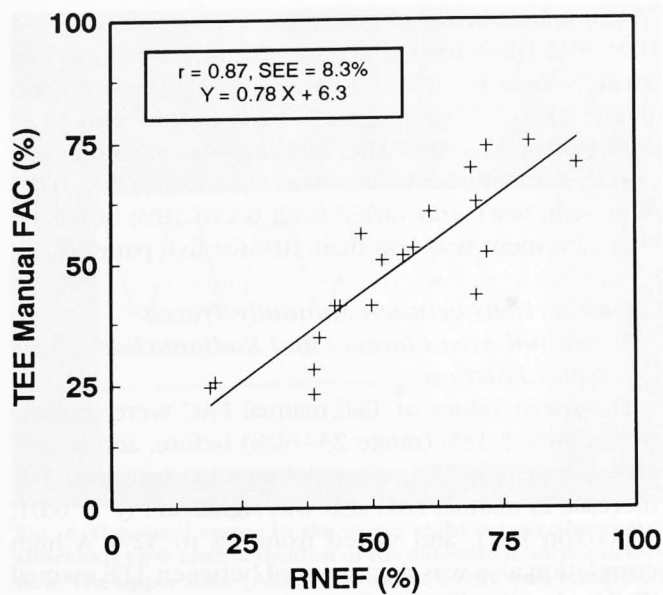

Fig. 5. Comparison between transesophageal manual fractional area changes and radionuclide ejection fraction. Regression line was not statistically different from the identity line ( $P = 0.64$ ).

areas and FAC derived from the automated border detection system (fig. 6). There was no statistical difference between the regression line and the identity line ( $P = 0.89$ ). Bias analysis showed a mean bias of 2.6% that was not statistically different from 0 ( $P = 0.21$ ), with 2 standard deviations of 17.9% (fig. 6). Fractional area change variations before and after dobutamine as obtained from manual tracing and automated analysis were also correlated ( $r = 0.75$ ,  $SEE = 4.6\%$ ,  $P < 0.02$ ).

## Discussion

This study assessed the ability of TEE to evaluate left ventricular EF by means of automated FAC, in critically ill and mechanically ventilated patients. The automated border detection system allowed, in real time, a good estimation of left ventricular function and correlated well with EF derived from radionuclide angiography ( $r = 0.85$ ). In addition, EF variations were significantly identified by automated TEE, with no discrepancy between the two methods regarding the direction of variation. However, the correlation between radionuclide EF and FAC variations was only fair ( $r = 0.70$ ), with changes in EF being overestimated by automated FAC. Previous studies using either transthoracic<sup>8-10</sup> or transesophageal<sup>11</sup> echocardiography have compared auto-

ated measurements of left ventricular mid-papillary cross-sectional area, with off-line manual analysis of identical or sequentially acquired echocardiographic images. They documented a significant correlation between automated and manually drawn FAC, similar to our results, with R-values ranging from 0.49 to 0.95.<sup>8-10</sup> In a recent editorial,<sup>23</sup> Martin pointed out that a comparison between the acoustic quantification and independent methods was needed to evaluate the accuracy of the automated border detection technique in

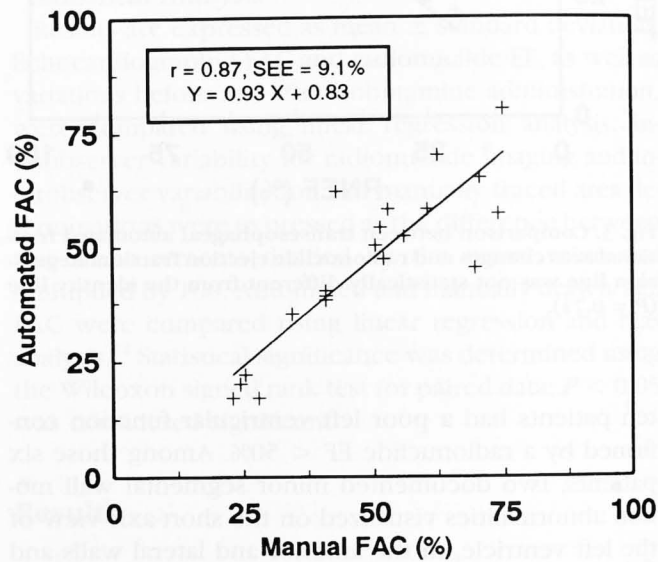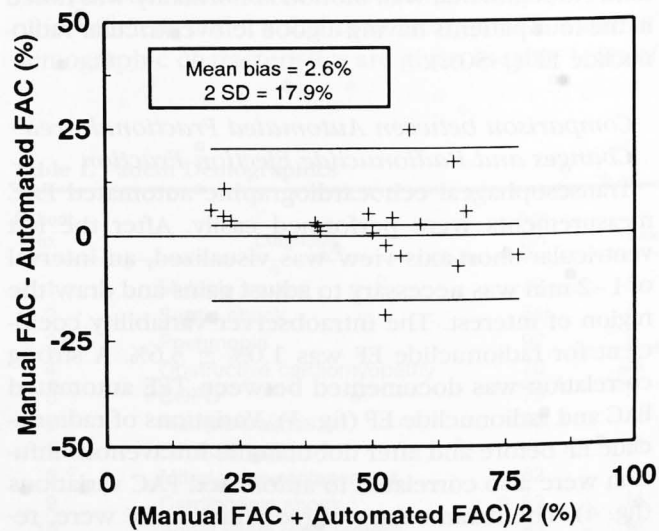

Fig. 6. Linear regression and bias analyses comparing transesophageal manual and automated fractional area changes.

assessing global le  
recent studies, us  
found a good cor  
either FAC determ  
phy<sup>12</sup> or EF measu  
with R-values rang  
tribution of the c  
FAC was demonst  
radionuclide EF  
and that dobutam  
albeit less correla  
However, for five  
less than 10%, w  
range of both me  
automated FAC a  
less correlated th

## Limitations of

Results of this  
during suspended  
quate short-axis v  
this short-axis vie  
measurements (e  
available. Border  
ity of echocardiog  
endocardial defin  
satisfactory result  
der detection in  
tion, automated  
pendent method:  
detection of the e  
only 5 dB, modif  
automated borde  
creases the ultras  
and lateral myoc  
the cross-sectiona  
els of gain gener  
underestimation o  
The operator mus  
a compromise be  
not change gain  
crease gain variat  
surements.

Lateral gain cor  
oped, allowing a h  
myocardial walls  
scanning.<sup>18,25</sup> Gor  
transthoracic auto  
inadequate in 19 o  
gain compensatio

## RADIONUCLIDE EF COMPARED TO TEE FAC

assessing global left ventricular systolic function. Three recent studies, using transthoracic echocardiography, found a good correlation between automated FAC and either FAC determined by ultrafast computed tomography<sup>12</sup> or EF measured by radionuclide angiography,<sup>13,14</sup> with R-values ranging from 0.84 to 0.92. The main contribution of the current study is that TEE automated FAC was demonstrated to be strongly correlated to radionuclide EF in mechanically ventilated patients, and that dobutamine-induced variations of EF were also albeit less correlated to TEE automated FAC variations. However, for five of ten patients, these variations were less than 10%, which is close to the reproducibility range of both methods. This might explain why TEE automated FAC and radionuclide EF variations were less correlated than the measurements themselves.

*Limitations of the Method*

Results of this study apply to anesthetized patients during suspended mechanical ventilation, when adequate short-axis view is obtained. In 10% of all patients, this short-axis view cannot be obtained<sup>4,7,11</sup> and FAC measurements (either manual or automated) are not available. Border detection accuracy relies on the quality of echocardiographic images, and requires adequate endocardial definition. In previously reported studies, satisfactory results were obtained from automated border detection in only 72-81% of patients.<sup>8,11</sup> In addition, automated border detection is a highly gain-dependent method: any alteration in gain settings alters detection of the endocardial border: a gain variation of only 5 dB, modifies significantly the FAC obtained by automated border detection.<sup>24</sup> A low level of gain decreases the ultrasound signal reflected from the septal and lateral myocardium leading to overestimation of the cross-sectional area. Conversely, excessive high levels of gain generate an increase in cavity noise with underestimation of left ventricular area as a result.<sup>8-11,24</sup> The operator must therefore adjust the gain settings as a compromise between these two extremes. We did not change gain settings during the protocol to decrease gain variation effects on automated FAC measurements.

Lateral gain compensation has been recently developed, allowing a higher endocardial definition from the myocardial walls oriented parallel to the ultrasound scanning.<sup>18,25</sup> Gorcsan *et al.* have demonstrated that transthoracic automated border detection studies were inadequate in 19 of the 66 patients before using lateral gain compensation.<sup>13</sup> Overestimation of end-systolic

area owing to septal and lateral wall dropout can be reduced by increasing lateral gain controls. Lateral gain compensation was not available in our study design, but our results are still comparable to those previously reported, using this software improvement. This is probably explained by the resolution image of TEE: the proximity of the heart to the echocardiographic probe allows the use of a higher frequency, near-focus transducer that produces higher resolution and improves signal-to-noise ratio.<sup>16</sup> Using TEE, the endocardial definition was thus sufficient enough to allow a good endocardial tracking by the automated border detection software leading to a good estimation of global left ventricular systolic function by automated FAC.

Lastly, radionuclide ventriculography also may be associated with variability<sup>26</sup> that could explain the merely fair correlation between variation measurements obtained in our patients.

In conclusion, FAC determined by automated border detection using TEE correlates well with EF measured by radionuclide angiography and allows on-line estimation of global left ventricular systolic function in selected intensive care unit patients. The accuracy of the automated method is comparable to that of manual planimetry provided that adequate endocardial definition is obtained.

**References**

1. Abel MD, Nishimura RA, Callahan MJ, Rehder K, Ilstrup DM, Tajik J: Evaluation of intraoperative transesophageal two-dimensional echocardiography. *ANESTHESIOLOGY* 1987; 66:64-8
2. Leung JM, O'Kelly BF, Mangano DT, and the SPI Research group: Relationship of regional wall motion abnormalities to hemodynamic indices of myocardial oxygen supply and demand in patients undergoing CABG surgery. *ANESTHESIOLOGY* 1990; 73:802-14
3. Konstadt SN, Thys D, Mindich BP, Kaplan JA, Goldman M: Validation of quantitative intraoperative transesophageal echocardiography. *ANESTHESIOLOGY* 1986; 65:418-21
4. Clements FM, Harpole DH, Quill T, Jones RH, McCann RL: Estimation of left ventricular volume and ejection fraction by two-dimensional transoesophageal echocardiography: Comparison of short axis imaging and simultaneous radionuclide angiography. *Br J Anaesth* 1990; 64:331-6
5. Hozumi T, Shakudo M, Shah PM: Quantitation of left ventricular volumes and ejection fraction by biplane transesophageal echocardiography. *Am J Cardiol* 1993; 72:356-9
6. Gorcsan III J, Gasior TA, Mandarino WA, Deneault LG, Hattler BG, Pinsky MR: On-line estimation of changes in left ventricular stroke volume by transesophageal echocardiographic automated border detection in patients undergoing coronary artery bypass grafting. *Am J Cardiol* 1993; 72:721-7
7. Urbanowicz JH, Shaaban MJ, Cohen NH, Cahalan MK, Botvinick

EH, Chatterjee K, Schiller NB, Dae MW, Matthay MA: Comparison of transesophageal echocardiographic and scintigraphic estimates of left ventricular end-diastolic volume index and ejection fraction in patients following coronary artery bypass grafting. *ANESTHESIOLOGY* 1990; 72:607-12

8. Pérez JE, Waggoner AD, Barzilai B, Melton HE, Miller JG, Sobel BE: On-line assessment of ventricular function by automatic boundary detection and ultrasonic backscatter imaging. *J Am Coll Cardiol* 1992; 19:313-20

9. Vandenberg BF, Rath LS, Stuhlmuller P, Melton HE, Skorton DJ: Estimation of left ventricular cavity area with an on-line, semiautomated echocardiographic edge detection system. *Circulation* 1992; 86:159-66

10. Herregods MC, Vermylen J, Bynens B, DeGeest H, VanDeWerf F: On-line quantification of left ventricular function by automatic boundary detection and ultrasonic backscatter imaging. *Am J Cardiol* 1993; 72:359-62

11. Cahalan MK, Ionescu P, Melton H, Adler S, Kee LL, Schiller NB: Automated real-time analysis of intraoperative transesophageal echocardiograms. *ANESTHESIOLOGY* 1993; 78:477-85

12. Marcus RH, Bednarz J, Coulden R, Shroff S, Lipton M, Lang RM: Ultrasonic backscatter system for automated on-line endocardial boundary detection: evaluation by ultrafast computed tomography. *J Am Coll Cardiol* 1993; 22:839-47

13. Gorcsan III J, Lazar JM, Schulman DS, Follansbee W: Comparison of left ventricular function by echocardiographic automated border detection and radionuclide ejection fraction. *Am J Cardiol* 1993; 72:810-15

14. Lindower PD, Rath L, Preslar J, Burns TL, Rezai K, Vandenberg BF: Quantification of left ventricular function with an automated border detection system and comparison with radionuclide ventriculography. *Am J Cardiol* 1994; 73:195-9

15. Stanck R, Hür G, Klepzig H. Jr, Maul FD, Boussmann W, Kaltenbach M: Sectoranalysis of left ventricular function by fully automated equilibrium radionuclide ventriculography. *Int J Card Imaging* 1985; 1:87-97

16. Seward JB, Bijoy K, Jae K, Abel, MD, Hughes RW, Edwards WD, Nichols BA, Freeman WK, Tajik J: Transesophageal echocardiography: Technique, anatomic correlations, implementation, and clinical applications. *Mayo Clin Proc* 1988; 63:649-80

17. Masuyama T, Nellessen, Schnittger I, Tye TL, Haskell WL, Popp RL: Ultrasonic tissue characterization with a real time integrated backscatter imaging system in normal and aging human hearts. *J Am Coll Cardiol* 1989; 14:1702-8

18. Pérez JE, Klein SC, Prater DM, Fraser CE, Cardona H, Waggoner AD, Holland MR, Miller JG, Sobel BE: Automated, on-line quantification of left ventricular dimensions and function by echocardiography with backscatter imaging and lateral gain compensation. *Am J Cardiol* 1992; 70:1200-5

19. Vered Z, Barzilai B, Mohr GA, Thomas III LJ, Genton R, Sobel BE, Shoup TA, Melton HE, Miller JG, Pérez JE: Quantitative ultrasonic tissue characterization with real-time integrated backscatter imaging in normal human subjects in patients with dilated cardiomyopathy. *Circulation* 1987; 76:1067-73

20. Wyatt HL, Haendchen RV, Meerbaum S, Corday E: Assessment of quantitative methods for two-dimensional echography. *Am J Cardiol* 1983; 53:369-401

21. Schiller NB, Shah PM, Crawford M, DeMaria A, Devereux R, Feigenbaum H, Gutgesell H, Reichek N, Sahn D, Schnittger I, Silverman NH, Tajik J: Recommendation for quantification of the left ventricle by two-dimensional echocardiography. *J Am Soc Echocardiogr* 1989; 2:358-67

22. Bland JM, Altman DG: Statistical methods for assessing agreement between two methods of clinical measurement. *Lancet* 1986; 1:307-10

23. Martin RP: Real time ultrasound quantification of ventricular function: Has the eyeball been replaced or will the subjective become objective? (editorial) *Am J Cardiol* 1992; 19:321-3

24. Smith MD, Xie GY, Sapin PM, Reed S, Cater A, Mahoney S, Kwan OL: Factors affecting the determination of the left ventricular area by acoustic quantification. (abstract) *J Am Coll Cardiol* 1992; 19:299A

25. Perez JE, Waggoner AD, Barzilai B, Davila-Roman VG, Cardona I, Prater DM, Fraser C, Miller JO: Lateral gain compensation: A new method to improve two dimensional echocardiographic imaging and facilitate on-line edge detection and quantification of ventricular function (abstract). *J Am Coll Cardiol* 1992; 19:261A

26. Upton MT, Rerych SK, Newman GE, Bounous EP Jr, Jones RH: The reproducibility of radionuclide angiographic measurements of left ventricular function in normal subjects at rest and during exercise. *Circulation* 1980; 62:126-32

## Do Children an Increase Tract Inf

Mark S. Schreiner,  
George D. Politis, I

**Background:** Laryngeal  
respiratory complications  
infection and general  
prospective studies  
in risk.

**Methods:** A case-control  
whether children with  
an upper respiratory tract  
infection of all patients  
the day surgery unit  
recent (within 2 weeks)  
and were questioned  
determine if the children  
upper respiratory tract  
selected from patients  
day of the laryngoscopy.

**Results:** Patients  
were 2.05 times (95%  
likely to have an acute  
by their parents than  
≤ 0.01). The development  
Tait and Knight's de

\* Associate Professor  
Philadelphia.

† Subspecialty Residency  
Hospital of Philadelphia

‡ Currently, Lecturer  
Philadelphia.

§ Lecturer in Anesthesiology  
Current position: Assistant  
of California, San Francisco

|| Current position:  
Gray School of Medicine

Received from the  
Hospital of Philadelphia, Philadelphia,  
sylvania. Submitted for  
publication April 20, 1995.

American Society of Anesthesiologists  
October 17-19, 1994.

Address reprint requests to:  
Anesthesiology and Critical Care  
Philadelphia, Philadelphia, PA

Electronic mail to: Schreiner

Anesthesiology, V 85,
